# Supplementary material for: Factors Influencing the Level of Depression and Anxiety of Community-Dwelling Patients with Schizophrenia in China during the COVID-19 Pandemic
Source: MDPI journal article supplement (doi:10.3390/ijerph20054376), 2023-02-28
Supplement: s1 [file s1]

## Research Questionnaire

### Part I Demographic information and general information

**1. What is your gender?**

- A. Male      B. Female

**2. What is your age?**

- A.  $\leq 18$
- B. 19~29
- C. 30~39
- D. 40~49
- E. 50~59

**3. What is your marital status?**

- A. With partner
- B. Without partner

**4. What is your education level?**

- A. Illiteracy
- B. Primary school
- C. Junior high school
- D. University and above

**5. How about your sleep status during the past 12 months?**

- A. Better
- B. Normal
- C. Poor

**6. Do you have other accompanying long-standing diseases besides mental illness?**

- A. Yes
- B. No

**7. Do you concern about the COVID-19?**

- A. Yes
- B. No

**8. How concerned are you about the COVID-19?**

- A. Less
- B. General
- C. More

## Part II Depression Scale and Anxiety Scale

### 1) The 7-item Generalized Anxiety Disorder (GAD-7)

There are 7 words below. Please read each carefully to understand the meaning. There are four grades after each word, which means: never; A few days; More than half of the days; Almost every day. According to your actual situation in the last two weeks, tick "✓" under the appropriate score of 0-3 points in the score column.

|                                                        | never | A few days | More than half of the days | Almost every day |
|--------------------------------------------------------|-------|------------|----------------------------|------------------|
| 1 . Feel uneasy, worried, irritable or irritable ..... | 0     | 1          | 2                          | 3                |
| 2 . Unable to stop or control worry .....              | 0     | 1          | 2                          | 3                |
| 3 . Too worried about all kinds of things .....        | 0     | 1          | 2                          | 3                |
| 4 . Very nervous, unable to relax .....                | 0     | 1          | 2                          | 3                |
| 5 . No appetite or overeating.....                     | 0     | 1          | 2                          | 3                |
| 6 . I am so anxious that I can't sit still.....        | 0     | 1          | 2                          | 3                |
| 7 . Worried that something bad would happen.....       | 0     | 1          | 2                          | 3                |

### 2) The 9-item Patient Health Questionnaire (PHQ-9)

There are 9 words below. Please read each one carefully to understand the meaning. There are four grades after each word, which means: never; A few days; More than half of the days; Almost every day. According to your actual situation in the last two weeks, mark "✓" under the appropriate score of 0-3 points in the score column.

|                                                     | never | A few days | More than half of the days | Almost every day |
|-----------------------------------------------------|-------|------------|----------------------------|------------------|
| 1 . Not interested in things .....                  | 0     | 1          | 2                          | 3                |
| 2 . Feeling depressed, depressed and hopeless ..... | 0     | 1          | 2                          | 3                |
| 3 . Can't sleep or sleep too long.....              | 0     | 1          | 2                          | 3                |
| 4 . Feeling tired or lacking energy.....            | 0     | 1          | 2                          | 3                |

|                                                                                                 |   |   |   |   |
|-------------------------------------------------------------------------------------------------|---|---|---|---|
| 5 . No appetite or overeating.....                                                              | 0 | 1 | 2 | 3 |
| 6 . Feeling guilty about yourself or feeling like a loser<br>or causing family failure...       | 0 | 1 | 2 | 3 |
| 7 . Unable to concentrate when doing things, such as reading<br>newspapers or watching TV ..... | 0 | 1 | 2 | 3 |
| 8 . Walking or talking is equivalent to slow or unusual excitement<br>and walking .....         | 0 | 1 | 2 | 3 |
| 9 . It's better to die or hurt yourself .....                                                   | 0 | 1 | 2 | 3 |
